# Supplementary material
Source: PubMed Central journal article supplement (PMC2841879)
Supplement: 0914213107_pnas.200914213SI.pdf [file 0914213107_pnas.200914213SI.pdf]

# Supporting Information

Gnjatic et al. 10.1073/pnas.0914213107

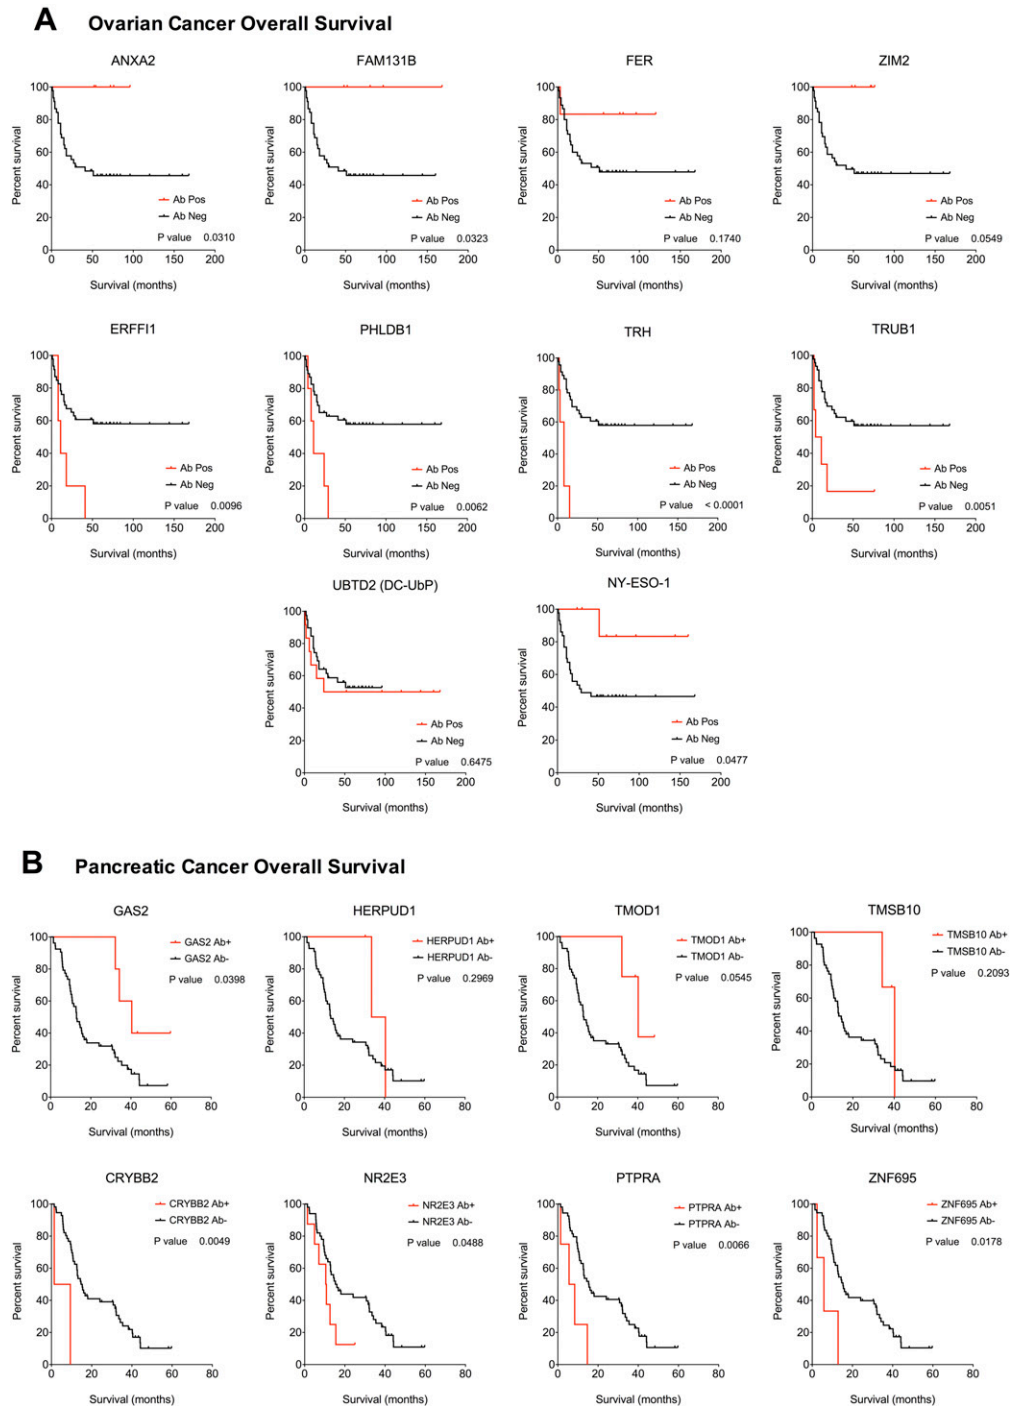

**Fig. S1.** Kaplan-Meier analyses of overall survival of cancer patients according to the presence of antibody response to a set of antigens. Detection of antibody response to antigens listed above each graph was measured in ovarian (A) and pancreatic (B) cancer patients. Associations of autoantibody responses with clinical outcome were assessed by comparing differences between curves with the log-rank method and judged significant if  $P < 0.05$ . The accession numbers of genes coding for these antigens are listed in Tables S1 and Tables S2.

**Table S1. Complete list of top 202 antigens immunogenic in ovarian cancer compared to healthy donor sera**

| Locus          | Symbol   | Frequency in healthy, % | Frequency in ovarian, % | Intensity* healthy | Intensity* ovarian | Overall score <sup>†</sup> |
|----------------|----------|-------------------------|-------------------------|--------------------|--------------------|----------------------------|
| BC033010.1     | ACRBP    | 2                       | 6                       | 1.06               | 1.66               | 5.0                        |
| NM_001626.2    | AKT2     | 2                       | 6                       | 1.74               | 10.32              | 10.5                       |
| BC035969.1     | ALB      | 2                       | 6                       | 1.26               | 1.86               | 5.2                        |
| NM_018466.2    | ALG13    | 2                       | 8                       | 1.85               | 2.31               | 8.1                        |
| NM_006401.1    | ANP32B   | 4                       | 10                      | 1.74               | 2.44               | 8.7                        |
| BC023990.1     | ANXA2    | 2                       | 12                      | 2.72               | 1.52               | 10.9                       |
| NM_001641.2    | APEX1    | 4                       | 16                      | 1.99               | 2.41               | 16.3                       |
| BC008145.1     | APEX1    | 2                       | 8                       | 2.21               | 1.88               | 7.2                        |
| BC060828.1     | ARID3A   | 2                       | 8                       | 2.45               | 2.23               | 7.7                        |
| NM_004311.1    | ARL3     | 4                       | 12                      | 1.23               | 2.04               | 10.9                       |
| NM_018184.1    | ARL8B    | 2                       | 6                       | 1.16               | 2.69               | 6.2                        |
| NM_052936.2    | ATG4A    | 0                       | 4                       | 1.00               | 5.87               | 7.1                        |
| NM_032352.1    | BRMS1L   | 2                       | 14                      | 1.95               | 1.73               | 14.1                       |
| NM_001007246.1 | BRWD1    | 2                       | 10                      | 7.05               | 2.81               | 10.2                       |
| BC050645.1     | BYSL     | 2                       | 10                      | 1.98               | 3.52               | 12.5                       |
| NM_017907.1    | C11orf59 | 2                       | 10                      | 1.57               | 2.09               | 10.3                       |
| BC016854.1     | C11orf67 | 4                       | 10                      | 1.60               | 5.26               | 12.6                       |
| NM_017822.2    | C12orf41 | 4                       | 12                      | 5.68               | 4.16               | 12.2                       |
| NM_033201.1    | C16orf45 | 4                       | 14                      | 7.89               | 6.02               | 17.5                       |
| BC022189.2     | C17orf47 | 0                       | 10                      | 1.00               | 2.00               | 12.4                       |
| NM_152266.1    | C19orf40 | 0                       | 10                      | 1.00               | 2.44               | 13.2                       |
| BC052573.1     | C19orf46 | 0                       | 10                      | 1.00               | 2.12               | 12.6                       |
| NM_019099.1    | C1orf183 | 0                       | 6                       | 1.00               | 1.74               | 7.1                        |
| NM_022104.1    | C20orf67 | 0                       | 10                      | 1.00               | 6.42               | 18.2                       |
| BC009485.1     | C4orf16  | 0                       | 4                       | 1.00               | 4.33               | 6.4                        |
| NM_145063.1    | C6orf130 | 0                       | 14                      | 1.00               | 1.56               | 15.9                       |
| BC022043.1     | C7orf36  | 4                       | 12                      | 1.57               | 3.08               | 12.7                       |
| BC009074.1     | C8orf70  | 0                       | 6                       | 1.00               | 2.69               | 8.2                        |
| NM_032596.3    | C9orf24  | 0                       | 4                       | 1.00               | 4.68               | 6.6                        |
| NM_012117.1    | CBX5     | 2                       | 12                      | 1.34               | 2.68               | 14.3                       |
| NM_144982.1    | CCDC131  | 2                       | 8                       | 1.35               | 1.48               | 6.9                        |
| NM_016360.1    | CCDC44   | 4                       | 16                      | 1.53               | 3.51               | 19.5                       |
| NM_000626.1    | CD79B    | 0                       | 6                       | 1.00               | 1.86               | 7.2                        |
| NM_003607.1    | CDC42BPA | 0                       | 6                       | 1.00               | 1.97               | 7.4                        |
| NM_006779.2    | CDC42EP2 | 4                       | 10                      | 2.18               | 2.48               | 8.4                        |
| BC010451.1     | CDC42EP4 | 2                       | 12                      | 1.27               | 1.92               | 12.6                       |
| NM_145810.1    | CDCA7    | 2                       | 8                       | 1.42               | 4.96               | 11.3                       |
| BC064145.1     | CDKAL1   | 2                       | 8                       | 1.11               | 10.99              | 15.5                       |
| NM_018413.2    | CHST11   | 0                       | 4                       | 1.00               | 2.67               | 5.4                        |
| BC070203.1     | COL4A6   | 0                       | 4                       | 1.00               | 3.76               | 6.1                        |
| NM_007263.3    | COPE     | 2                       | 10                      | 1.51               | 1.99               | 10.2                       |
| BC015634.1     | COQ3     | 4                       | 12                      | 3.37               | 3.41               | 12.0                       |
| NM_006067.3    | COX4NB   | 0                       | 4                       | 1.00               | 2.85               | 5.6                        |
| NM_024695.1    | CPLX3    | 4                       | 8                       | 1.47               | 2.56               | 6.4                        |
| NM_130898.1    | CREB3L4  | 2                       | 8                       | 1.69               | 1.96               | 7.6                        |
| NM_016823.2    | CRK      | 2                       | 10                      | 1.91               | 1.47               | 8.8                        |
| NM_177559.2    | CSNK2A1  | 6                       | 12                      | 2.03               | 1.93               | 7.5                        |
| BC011668.1     | CSNK2A1  | 4                       | 10                      | 5.25               | 1.79               | 5.3                        |
| NM_004078.1    | CSRP1    | 0                       | 6                       | 1.00               | 2.54               | 8.0                        |
| NM_018959.1    | DAZAP1   | 2                       | 8                       | 2.10               | 2.13               | 7.7                        |
| BC001286.1     | DCTD     | 4                       | 12                      | 1.58               | 1.69               | 9.6                        |
| NM_001930.2    | DHPS     | 2                       | 10                      | 1.42               | 3.62               | 12.9                       |
| NM_138930.2    | DIABLO   | 2                       | 10                      | 1.16               | 1.75               | 9.8                        |
| BC069363.1     | DLX6     | 0                       | 6                       | 1.00               | 2.76               | 8.2                        |
| BC033159.1     | DNAJC8   | 0                       | 4                       | 1.00               | 2.66               | 5.4                        |
| NM_006442.2    | DRAP1    | 0                       | 14                      | 1.00               | 2.07               | 17.5                       |
| NM_003746.1    | DYNLL1   | 0                       | 4                       | 1.00               | 3.19               | 5.8                        |
| BC013648.1     | EFHD2    | 0                       | 6                       | 1.00               | 1.71               | 7.0                        |
| NM_003754.1    | EIF3S5   | 4                       | 12                      | 3.47               | 1.65               | 8.2                        |
| NM_005232.1    | EPHA1    | 2                       | 12                      | 1.01               | 3.01               | 15.1                       |
| NM_004441.2    | EPHB1    | 0                       | 8                       | 1.00               | 2.55               | 10.7                       |
| NM_018948.2    | ERRFI1   | 0                       | 10                      | 1.00               | 3.43               | 14.8                       |
| BC050543.1     | FAM131B  | 4                       | 12                      | 2.78               | 1.79               | 9.0                        |

Table S1. Cont.

| Locus          | Symbol    | Frequency in healthy, % | Frequency in ovarian, % | Intensity* healthy | Intensity* ovarian | Overall score <sup>†</sup> |
|----------------|-----------|-------------------------|-------------------------|--------------------|--------------------|----------------------------|
| NM_152789.1    | FAM133B   | 2                       | 6                       | 1.04               | 4.53               | 7.8                        |
| NM_152421.2    | FAM69B    | 0                       | 6                       | 1.00               | 2.09               | 7.5                        |
| NM_018145.1    | FAM82C    | 2                       | 10                      | 2.17               | 1.79               | 9.5                        |
| NM_005246.1    | FER       | 0                       | 12                      | 1.00               | 2.77               | 16.5                       |
| NM_015850.2    | FGFR1     | 4                       | 12                      | 3.20               | 7.16               | 17.1                       |
| BC000084.1     | FLJ10357  | 2                       | 8                       | 3.02               | 1.49               | 6.2                        |
| NM_144595.1    | FLJ30046  | 0                       | 4                       | 1.00               | 3.71               | 6.1                        |
| BC021906.1     | FMNL1     | 2                       | 6                       | 1.05               | 6.05               | 8.8                        |
| NM_144769.1    | FOXI1     | 2                       | 8                       | 1.19               | 3.87               | 10.3                       |
| BC009642.1     | FXYD5     | 0                       | 10                      | 1.00               | 1.76               | 11.8                       |
| BC008668.1     | GAK       | 6                       | 12                      | 1.34               | 3.25               | 11.2                       |
| NM_177553.1    | GAS2      | 0                       | 4                       | 1.00               | 3.70               | 6.1                        |
| BC001152.1     | GAS7      | 2                       | 10                      | 1.11               | 2.30               | 11.0                       |
| NM_201432.1    | GAS7      | 2                       | 12                      | 1.01               | 2.15               | 13.3                       |
| NM_178044.1    | GIYD2     | 0                       | 4                       | 1.00               | 5.26               | 6.8                        |
| BC015848.1     | GLOD4     | 0                       | 8                       | 1.00               | 1.42               | 8.8                        |
| NM_033003.1    | GTF2I     | 0                       | 6                       | 1.00               | 3.14               | 8.6                        |
| NM_138612.1    | HAS3      | 2                       | 6                       | 1.87               | 2.20               | 5.3                        |
| BC021278.1     | HKDC1     | 0                       | 8                       | 1.00               | 2.67               | 10.9                       |
| BC008959.1     | HM13      | 0                       | 8                       | 1.00               | 6.89               | 14.9                       |
| NM_002128.2    | HMGB1     | 4                       | 10                      | 2.29               | 2.15               | 7.7                        |
| BC015358.1     | HTATIP2   | 2                       | 6                       | 0.78               | 3.46               | 7.2                        |
| NM_033261.2    | ID12      | 2                       | 6                       | 1.11               | 2.01               | 5.5                        |
| NM_021803.1    | IL21      | 0                       | 6                       | 1.00               | 2.52               | 8.0                        |
| NM_173192.1    | KCNIP2    | 4                       | 10                      | 1.65               | 1.61               | 7.0                        |
| BC025726.1     | KCNK17    | 0                       | 8                       | 1.00               | 1.55               | 9.1                        |
| NM_024076.1    | KCTD15    | 0                       | 10                      | 1.00               | 2.60               | 13.5                       |
| BC052802.1     | KIAA0467  | 2                       | 8                       | 1.12               | 2.03               | 8.0                        |
| BC017355.1     | KPNA3     | 6                       | 16                      | 1.23               | 2.16               | 14.2                       |
| BC021241.2     | KRT81     | 2                       | 8                       | 1.05               | 1.70               | 7.5                        |
| BC001370.2     | LIMS2     | 2                       | 6                       | 1.30               | 4.15               | 7.4                        |
| BC066353.1     | LMX1A     | 2                       | 8                       | 4.03               | 2.48               | 7.6                        |
| BC062736.1     | LOC503543 | 0                       | 6                       | 1.00               | 1.91               | 7.3                        |
| NM_138353.1    | LOC90379  | 2                       | 14                      | 1.09               | 1.77               | 14.7                       |
| BC003408.2     | MAGEA12   | 2                       | 8                       | 1.39               | 2.79               | 8.9                        |
| NM_002362.2    | MAGEA4    | 0                       | 4                       | 1.00               | 29.91              | 12.2                       |
| NM_002364.1    | MAGEB2    | 4                       | 10                      | 7.67               | 2.61               | 6.1                        |
| NM_032332.2    | MORG1     | 2                       | 8                       | 1.02               | 1.69               | 7.4                        |
| NM_002753.2    | MAPK10    | 0                       | 6                       | 1.00               | 2.84               | 8.3                        |
| NM_138993.1    | MAPK11    | 2                       | 10                      | 1.25               | 4.42               | 14.1                       |
| NM_004635.2    | MAPKAPK3  | 0                       | 10                      | 1.00               | 1.81               | 12.0                       |
| NM_003668.2    | MAPKAPK5  | 2                       | 10                      | 14.49              | 3.70               | 10.6                       |
| NM_003668.2    | MAPKAPK5  | 0                       | 8                       | 1.00               | 3.14               | 11.5                       |
| NM_032601.2    | MCEE      | 4                       | 10                      | 1.11               | 2.56               | 9.5                        |
| BC009398.1     | MCM7      | 0                       | 6                       | 1.00               | 1.52               | 6.8                        |
| BC006005.1     | MDS032    | 2                       | 8                       | 1.34               | 1.81               | 7.5                        |
| NM_006343.1    | MERTK     | 2                       | 10                      | 1.11               | 3.06               | 12.3                       |
| BC028039.1     | MGC39900  | 4                       | 12                      | 2.05               | 1.85               | 9.6                        |
| NM_001004306.1 | MGC87631  | 2                       | 8                       | 1.01               | 2.13               | 8.2                        |
| NM_015246.1    | MGRN1     | 0                       | 6                       | 1.00               | 2.33               | 7.8                        |
| NM_017572.1    | MKNK2     | 2                       | 6                       | 1.25               | 2.70               | 6.2                        |
| NM_198204.1    | MLX       | 2                       | 12                      | 1.75               | 2.15               | 12.9                       |
| NM_020236.2    | MRPL1     | 2                       | 6                       | 2.11               | 2.46               | 5.5                        |
| BC052601.1     | MRPL10    | 0                       | 6                       | 1.00               | 2.42               | 7.9                        |
| NM_006428.3    | MRPL28    | 2                       | 12                      | 3.01               | 1.94               | 11.9                       |
| BC030521.2     | MRPS27    | 0                       | 6                       | 1.00               | 3.28               | 8.7                        |
| NM_007067.3    | MYST2     | 0                       | 14                      | 1.00               | 3.08               | 20.0                       |
| NM_005000.2    | NDUFA5    | 2                       | 10                      | 2.98               | 3.83               | 12.6                       |
| NM_002505.3    | NFYA      | 2                       | 10                      | 1.21               | 2.80               | 11.8                       |
| NM_006993.1    | NPM3      | 4                       | 16                      | 1.44               | 2.65               | 17.5                       |
| NM_052935.2    | NT5C3L    | 0                       | 4                       | 1.00               | 3.30               | 5.8                        |
| BC010176.1     | NY-SAR-48 | 0                       | 8                       | 1.00               | 2.70               | 10.9                       |

Table S1. Cont.

| Locus          | Symbol   | Frequency in healthy, % | Frequency in ovarian, % | Intensity* healthy | Intensity* ovarian | Overall score <sup>†</sup> |
|----------------|----------|-------------------------|-------------------------|--------------------|--------------------|----------------------------|
| BC009779.1     | ODF2L    | 0                       | 4                       | 1.00               | 2.30               | 5.2                        |
| NM_012373.1    | OR3A3    | 4                       | 10                      | 2.33               | 1.73               | 6.8                        |
| NM_014562.2    | OTX1     | 0                       | 4                       | 1.00               | 2.75               | 5.5                        |
| NM_001014831.1 | PAK4     | 2                       | 10                      | 1.47               | 1.57               | 9.3                        |
| NM_148978.1    | PANK1    | 2                       | 8                       | 1.32               | 4.94               | 11.3                       |
| BC039742.1     | PCBP1    | 4                       | 8                       | 1.07               | 1.64               | 5.4                        |
| NM_002591.2    | PCK1     | 4                       | 10                      | 1.32               | 3.63               | 10.9                       |
| NM_030948.1    | PHACTR1  | 2                       | 8                       | 1.82               | 2.95               | 9.0                        |
| BC013031.1     | PHLDB1   | 2                       | 10                      | 1.20               | 1.79               | 9.9                        |
| BC030815.1     | PIK3R1   | 0                       | 6                       | 1.00               | 1.67               | 7.0                        |
| NM_001722.2    | POLR3D   | 0                       | 6                       | 1.00               | 2.12               | 7.6                        |
| NM_004227.3    | PSCD3    | 0                       | 10                      | 1.00               | 1.48               | 11.2                       |
| NM_170750.1    | PSMD10   | 2                       | 10                      | 1.54               | 1.35               | 8.7                        |
| BC001772.1     | QARS     | 2                       | 8                       | 1.53               | 2.02               | 7.7                        |
| NM_030981.1    | RAB1B    | 4                       | 8                       | 1.22               | 2.13               | 6.1                        |
| BC002510.2     | RAB6B    | 0                       | 4                       | 1.00               | 4.11               | 6.3                        |
| NM_005053.2    | RAD23A   | 4                       | 14                      | 1.42               | 2.66               | 14.8                       |
| NM_005105.2    | RBM8A    | 6                       | 14                      | 1.79               | 1.55               | 9.0                        |
| BC013115.1     | RBM9     | 0                       | 6                       | 1.00               | 2.08               | 7.5                        |
| NM_016606.2    | REEP2    | 0                       | 6                       | 1.00               | 2.48               | 8.0                        |
| NM_006480.4    | RGS14    | 0                       | 6                       | 1.00               | 2.39               | 7.9                        |
| BC043348.2     | RP2      | 4                       | 10                      | 1.42               | 2.16               | 8.4                        |
| NM_002946.2    | RPA2     | 2                       | 10                      | 1.02               | 3.68               | 13.2                       |
| NM_015414.2    | RPL36    | 2                       | 8                       | 4.37               | 1.77               | 6.4                        |
| BC001697.1     | RPS15A   | 2                       | 8                       | 1.02               | 2.25               | 8.4                        |
| BC014959.1     | RYBP     | 0                       | 6                       | 1.00               | 2.48               | 8.0                        |
| NM_005620.1    | S100A11  | 0                       | 10                      | 1.00               | 1.67               | 11.6                       |
| NM_005621.1    | S100A12  | 0                       | 8                       | 1.00               | 2.05               | 10.0                       |
| BC024245.2     | SALL2    | 0                       | 8                       | 1.00               | 1.85               | 9.6                        |
| BC041638.1     | SART3    | 0                       | 8                       | 1.00               | 4.48               | 12.9                       |
| NM_005698.2    | SCAMP3   | 2                       | 8                       | 1.31               | 1.77               | 7.4                        |
| NM_020423.1    | SCYL3    | 0                       | 8                       | 1.00               | 3.11               | 11.4                       |
| BC000463.1     | SF3B3    | 2                       | 8                       | 1.21               | 2.49               | 8.6                        |
| NM_005901.2    | SMAD2    | 2                       | 12                      | 2.94               | 2.15               | 12.5                       |
| NM_005902.1    | SMAD3    | 0                       | 6                       | 1.00               | 3.38               | 8.8                        |
| NM_004782.2    | SNAP29   | 0                       | 4                       | 1.00               | 3.44               | 5.9                        |
| NM_015464.1    | SOSTDC1  | 0                       | 6                       | 1.00               | 4.84               | 10.0                       |
| NM_021203.2    | SRPRB    | 0                       | 6                       | 1.00               | 1.47               | 6.7                        |
| BC007919.2     | STARD10  | 2                       | 10                      | 1.32               | 2.24               | 10.8                       |
| NM_006374.2    | STK25    | 0                       | 6                       | 1.00               | 1.40               | 6.6                        |
| NM_178509.3    | STXBP4   | 2                       | 6                       | 2.21               | 9.07               | 9.8                        |
| BC010537.1     | SUB1     | 0                       | 10                      | 1.00               | 1.50               | 11.2                       |
| NM_006713.2    | SUB1     | 2                       | 8                       | 1.22               | 1.55               | 7.1                        |
| NM_003352.4    | SUMO1    | 2                       | 10                      | 1.31               | 4.18               | 13.7                       |
| BC022340.1     | SUMO2    | 2                       | 6                       | 1.10               | 2.83               | 6.4                        |
| NM_153694.3    | SYCP3    | 0                       | 6                       | 1.00               | 1.99               | 7.4                        |
| NM_013342.1    | TFPT     | 0                       | 6                       | 1.00               | 1.49               | 6.7                        |
| NM_021809.2    | TGIF2    | 4                       | 10                      | 1.62               | 12.63              | 18.4                       |
| BC029920.1     | TGIF2LX  | 4                       | 10                      | 1.77               | 27.12              | 24.9                       |
| BC001852.2     | THG1L    | 2                       | 10                      | 1.99               | 1.79               | 9.5                        |
| NM_138461.1    | TM4SF19  | 2                       | 6                       | 1.06               | 2.17               | 5.7                        |
| NM_145041.1    | TMEM106A | 2                       | 12                      | 1.36               | 2.03               | 12.8                       |
| BC002660.1     | TMOD1    | 0                       | 6                       | 1.00               | 3.75               | 9.1                        |
| BC053675.1     | TMPO     | 4                       | 10                      | 2.25               | 5.23               | 12.1                       |
| NM_021103.2    | TMSB10   | 2                       | 10                      | 1.08               | 2.67               | 11.7                       |
| NM_032174.2    | TOMM40L  | 4                       | 8                       | 1.15               | 3.57               | 8.0                        |
| BC003596.1     | TP53     | 0                       | 10                      | 1.00               | 4.82               | 16.6                       |
| BC070290.1     | TRDN     | 2                       | 6                       | 1.10               | 3.66               | 7.1                        |
| NM_007117.1    | TRH      | 0                       | 10                      | 1.00               | 1.89               | 12.1                       |
| NM_004240.2    | TRIP10   | 2                       | 10                      | 2.17               | 1.91               | 9.7                        |
| NM_139169.2    | TRUB1    | 2                       | 12                      | 1.43               | 2.41               | 13.6                       |
| NM_030935.1    | TSC22D4  | 2                       | 12                      | 1.08               | 8.69               | 22.3                       |

**Table S1. Cont.**

| Locus       | Symbol   | Frequency in healthy, % | Frequency in ovarian, % | Intensity* healthy | Intensity* ovarian | Overall score <sup>†</sup> |
|-------------|----------|-------------------------|-------------------------|--------------------|--------------------|----------------------------|
| NM_130465.3 | TSPAN17  | 6                       | 14                      | 6.36               | 1.98               | 6.8                        |
| NM_015959.1 | TXNDC14  | 0                       | 4                       | 1.00               | 4.70               | 6.6                        |
| NM_181892.1 | UBE2D3   | 2                       | 8                       | 1.13               | 1.89               | 7.7                        |
| NM_003348.3 | UBE2N    | 2                       | 8                       | 1.16               | 2.52               | 8.7                        |
| BC043346.2  | UBL4A    | 2                       | 8                       | 1.07               | 13.11              | 16.6                       |
| NM_152277.1 | UBTD2    | 6                       | 24                      | 1.82               | 3.93               | 30.2                       |
| NM_173517.3 | VKORC1L1 | 0                       | 4                       | 1.00               | 24.50              | 11.4                       |
| BC001001.2  | VPS8     | 6                       | 12                      | 1.78               | 1.87               | 7.7                        |
| BC023556.2  | VRK3     | 0                       | 6                       | 1.00               | 2.50               | 8.0                        |
| NM_015671.2 | WDR62    | 0                       | 4                       | 1.00               | 4.71               | 6.6                        |
| NM_003404.2 | YWHAB    | 0                       | 8                       | 1.00               | 3.74               | 12.2                       |
| NM_017612.1 | ZCCHC8   | 2                       | 8                       | 1.48               | 2.76               | 8.9                        |
| NM_015363.3 | ZIM2     | 2                       | 10                      | 1.36               | 3.80               | 13.2                       |
| BC000876.1  | ZNF174   | 2                       | 10                      | 1.21               | 1.54               | 9.3                        |
| BC002859.1  | ZNF434   | 0                       | 14                      | 1.00               | 1.71               | 16.4                       |

\*Intensity represents the average ratio of observed reactivity over cutoff, for healthy donor and ovarian cancer sera, respectively.

<sup>†</sup>The score is calculated as  $(\text{Freq}_{\text{ovarian}} \times \sqrt{\text{Intensity}_{\text{ovarian}}}) - (\text{Freq}_{\text{healthy}} \times \sqrt{\text{Intensity}_{\text{healthy}}})$  as described (1).

1. Gnjjatic S, et al. (2009) Seromic analysis of antibody responses in non-small cell lung cancer patients and healthy donors using conformational protein arrays. J Immunol Methods 341:50-58.

**Table S2. Complete list of top 29 antigens immunogenic in pancreatic cancer compared to healthy donor sera**

| Locus          | Symbol    | Frequency in healthy, % | Frequency in ovarian, % | Intensity* healthy | Intensity* ovarian | Overall score <sup>†</sup> |
|----------------|-----------|-------------------------|-------------------------|--------------------|--------------------|----------------------------|
| BC021245.2     | AFG3L1    | 0                       | 5                       | 1.00               | 1.96               | 6.3                        |
| BC028124.1     | C17orf46  | 0                       | 5                       | 1.00               | 2.88               | 7.1                        |
| BC009485.1     | C4orf16   | 0                       | 5                       | 1.00               | 1.83               | 6.1                        |
| NM_153344.1    | C6orf141  | 0                       | 8                       | 1.00               | 1.96               | 10.4                       |
| NM_052958.1    | C8orf34   | 0                       | 7                       | 1.00               | 1.48               | 7.6                        |
| BC030210.1     | CD79B     | 0                       | 5                       | 1.00               | 1.75               | 6.0                        |
| NM_004269.2    | CRSP8     | 0                       | 5                       | 1.00               | 1.08               | 5.1                        |
| NM_000496.1    | CRYBB2    | 2                       | 3                       | 1.00               | 9.99               | 5.3                        |
| NM_006145.1    | DNAJB1    | 0                       | 5                       | 1.00               | 1.97               | 6.3                        |
| NM_018696.1    | ELAC1     | 0                       | 3                       | 1.00               | 4.46               | 5.5                        |
| BC063126.1     | FAM13A1   | 0                       | 5                       | 1.00               | 6.58               | 9.4                        |
| NM_177553.1    | GAS2      | 2                       | 8                       | 1.11               | 1.65               | 7.9                        |
| NM_001002018.1 | HCFC1R1   | 0                       | 3                       | 1.00               | 3.50               | 5.1                        |
| BC009739.1     | HERPUD1   | 0                       | 5                       | 1.00               | 2.77               | 7.0                        |
| NM_020954.1    | KIAA1618  | 2                       | 8                       | 2.77               | 1.64               | 7.2                        |
| BC037982.1     | LRRC49    | 0                       | 7                       | 1.00               | 2.78               | 9.4                        |
| BC032539.1     | MAPK9     | 0                       | 8                       | 1.00               | 2.33               | 11.0                       |
| NM_002752.3    | MAPK9     | 0                       | 8                       | 1.00               | 1.60               | 9.8                        |
| BC041421.1     | NR2E3     | 4                       | 13                      | 1.94               | 1.55               | 10.7                       |
| BC010176.1     | NY-SAR-48 | 0                       | 5                       | 1.00               | 1.65               | 5.9                        |
| NM_015869.2    | PPARG     | 0                       | 5                       | 1.00               | 1.16               | 5.3                        |
| NM_080840.1    | PTPRA     | 0                       | 7                       | 1.00               | 3.10               | 9.7                        |
| NM_004560.2    | ROR2      | 4                       | 12                      | 1.25               | 1.68               | 9.8                        |
| NM_007373.2    | SHOC2     | 4                       | 5                       | 1.53               | 7.23               | 5.3                        |
| NM_175840.1    | SMOX      | 0                       | 5                       | 1.00               | 1.97               | 6.3                        |
| BC002660.1     | TMOD1     | 2                       | 7                       | 1.10               | 3.83               | 8.5                        |
| NM_021103.2    | TMSB10    | 0                       | 5                       | 1.00               | 2.29               | 6.6                        |
| NM_017886.1    | ULK4      | 0                       | 7                       | 1.00               | 2.14               | 8.6                        |
| BC041082.1     | ZNF695    | 0                       | 5                       | 1.00               | 1.18               | 5.3                        |

\*Intensity represents the average ratio of observed reactivity over cutoff, for healthy donor and pancreatic cancer sera, respectively.

<sup>†</sup>The score is calculated as  $(\text{Freq}_{\text{pancreatic}} \times \sqrt[3]{\text{Intensity}_{\text{pancreatic}}}) - (\text{Freq}_{\text{healthy}} \times \sqrt[3]{\text{Intensity}_{\text{healthy}}})$  as described (1).

1. Gnjjatic S, et al. (2009) Seromic analysis of antibody responses in non-small cell lung cancer patients and healthy donors using conformational protein arrays. *J Immunol Methods* 341: 50–58.

**Table S3. List of antigens previously detected by SEREX**

| In common with ovarian top list | In common with pancreatic top list |
|---------------------------------|------------------------------------|
| ALB                             | DNAJB1                             |
| ANXA2                           | NY-SAR-48                          |
| BRWD1                           |                                    |
| CBX5                            |                                    |
| CDC42EP2                        |                                    |
| CDC42EP4                        |                                    |
| CREB3L4                         |                                    |
| EFHD2                           |                                    |
| FER                             |                                    |
| FXYS5                           |                                    |
| GTF2I                           |                                    |
| MAGEA4                          |                                    |
| MCM7                            |                                    |
| MKNK2                           |                                    |
| NY-SAR-48                       |                                    |
| POLR3D                          |                                    |
| RPA2                            |                                    |
| RPS15A                          |                                    |
| TP53                            |                                    |

**Table S4. Selection of genes coding for immunogenic proteins in ovarian cancer and described for their cancer or germ-cell specific expression and/or function**

| Symbol                      | Findings                                                                                                                                                                                            | References                                                                                |
|-----------------------------|-----------------------------------------------------------------------------------------------------------------------------------------------------------------------------------------------------|-------------------------------------------------------------------------------------------|
| ACRBP (OY-<br>TES-1)        | Found in 69% of epithelial ovarian cancers and immunogenic in 10%                                                                                                                                   | <i>Int J Oncol.</i> 2006;29:903–910                                                       |
| AKT2                        | Amplified and activated in 40–70% of epithelial ovarian cancers                                                                                                                                     | <i>Oncogene.</i> 2000;19:2324–2330; <i>Oncogene.</i> 2004;23,5853–5857                    |
| ANXA2<br>(Annexin A2)       | Frequent autoantibodies in non-small cell lung cancer                                                                                                                                               | <i>Proc Natl Acad Sci U S A.</i> 2001;98(17):9824–9829.                                   |
| APEX1                       | Common somatic mutations in ovarian cancer                                                                                                                                                          | <i>Mutat Res.</i> 2001;432(3-4):53–59; <i>Clin Cancer Res.</i> 2000;6(2):602–609          |
| ARL3<br>RP2<br>BRWD1        | Interact with each other, GTPase-activating                                                                                                                                                         | <i>Hum Mol Genet.</i> 2002;11(24):3065–3074                                               |
| BYSL (Bystin-<br>like)      | Normal spermiogenesis and the oocyte-embryo transition                                                                                                                                              | <i>Dev Biol.</i> 2008;317(1):72–82                                                        |
| CBX5 (HP1 $\alpha$ homolog) | Human embryo implantation, up-regulated in gastric cancer                                                                                                                                           | <i>Cancer Biol Ther.</i> 2008;7(8):1165; <i>J Pathol.</i> 2008;216(4):471–482             |
| CDC42EP4                    | Known autoantibodies to centromeres, expressed in oocytes                                                                                                                                           | <i>J Mol Med.</i> 1998;76(1):54–60; <i>BMC Genomics.</i> 2009;10:10                       |
| CREB3L4                     | Overexpressed in glioblastoma                                                                                                                                                                       | <i>J Neurooncol.</i> 2008;88(3):281–291                                                   |
| DAZAP1, DYNLL1              | Overexpressed in hepatocellular carcinoma                                                                                                                                                           | <i>Cancer Genet Cytogenet.</i> 2008;180(1):30–36                                          |
| DIABLO                      | Maturation of oocytes                                                                                                                                                                               | <i>Fertil Steril.</i> 2005;84(Suppl 2):1089–1094; <i>Mol Reprod Dev.</i> 2008;75(1):17–25 |
| EPHA1                       | Poor prognosis of colorectal cancer when decreased                                                                                                                                                  | <i>Oncol Rep.</i> 2009;21(2):351–355                                                      |
| EPHB1                       | Overexpression in advanced ovarian cancer correlates with shortened survival                                                                                                                        | <i>BMC Cancer.</i> 2006;6:144                                                             |
| FER                         | Underexpressed in colorectal cancer                                                                                                                                                                 | <i>Pathobiology.</i> 2008;75(5):274–280                                                   |
| FGFR1                       | Promotes prostate cancer growth                                                                                                                                                                     | <i>Mol Cancer Res.</i> 2009;7(1):142–155                                                  |
| FMNL1                       | Promotes proliferation in bladder cancer                                                                                                                                                            | <i>Cancer Res.</i> 2009;69(11):4613–4620                                                  |
| FXYD5<br>(Dysadherin)       | Antitumor T cells in malignancies                                                                                                                                                                   | <i>Blood.</i> 2007;110(8):2931–2939                                                       |
| HMGB1                       | Cancer progression                                                                                                                                                                                  | <i>Cancer Lett.</i> 2007;255(2):161–169                                                   |
| HTATIP2                     | Expression associated with differential chemotherapy response in serous epithelial ovarian; known autoantibodies to this cytokine that mediates the response to infection, injury, and inflammation | <i>Neoplasia.</i> 2005;7(6):603–613; <i>Clin Exp Immunol.</i> 1997;107(1):135–140         |
| LMX1                        | Progression and metastasis of prostate and gastric cancer                                                                                                                                           | <i>Int J Cancer.</i> 2008;123(4):810–816; <i>Gastroenterology.</i> 2009;136(2):640–651    |
| MAGEA12, MAGEA4,<br>MAGEB2  | Methylated in cervical cancer                                                                                                                                                                       | <i>Int J Cancer.</i> 2008;123(1):161–167                                                  |
| MCM7                        | Cancer testis antigens, immunogenic for MAGEA4                                                                                                                                                      |                                                                                           |
| MYST2                       | Expressed in oral squamous cell carcinoma                                                                                                                                                           | <i>Anticancer Res.</i> 2008;28(6A):3763–3769                                              |
| NDUFA5                      | Enhances growth of breast cancer                                                                                                                                                                    | <i>Mol Cancer Res.</i> 2009;7(4):511–522                                                  |
| NPM3                        | Overexpressed in human cervical carcinoma cell lines                                                                                                                                                | <i>Biochem Biophys Res Commun.</i> 2006;339(3):852–857                                    |
| PAK4                        | Histone-binding protein in embryonic stem cells                                                                                                                                                     | <i>Dev Growth Differ.</i> 2008;50(5):307–320                                              |
| PIK3R1                      | Amplified in pancreas ductal adenocarcinoma                                                                                                                                                         | <i>Proc Natl Acad Sci U S A.</i> 2008; 105(49):19372–19377                                |
| PSMD10<br>(Gankyrin)        | Oncogene in human ovarian and colon tumors, mutated in glioblastoma                                                                                                                                 | <i>Cancer Res.</i> 2001;61(20):7426–7429; <i>Nature.</i> 2008;455(7216):1061–1068         |
| RPM8A                       | Overexpressed in cancer; oncoprotein and regulator of pRb and p53                                                                                                                                   | <i>Cancer Cell.</i> 2005;8(1):3–4                                                         |
| S100A11                     | Predicts lymph node metastasis in cervical cancer                                                                                                                                                   | <i>Cancer Sci.</i> 2008;99(1):31–38                                                       |
| SALL2                       | Putative tumor suppressor gene, overexpressed in colorectal and pancreatic cancer                                                                                                                   | <i>Clin Cancer Res.</i> 2006;12(18):5417–5422                                             |
| SART3                       | Associated with tongue cancer invasiveness                                                                                                                                                          | <i>BMC Cancer.</i> 2009;9:11                                                              |
| SMAD2                       | Tumor-rejection antigen                                                                                                                                                                             | <i>Jpn J Cancer Res.</i> 2000;91(11):1177–1184                                            |
| SMAD3                       | Regulates gonadal tumorigenesis                                                                                                                                                                     | <i>Mol Endocrinol.</i> 2007;21(10):2472–2486                                              |
| STARD10<br>(NY-CO-28)       | Overexpressed in breast cancer and cooperates with ErbB receptors in cellular transformation                                                                                                        | <i>Cancer Res.</i> 2004;64(10):3538–3544                                                  |
| SUB1                        | Up-regulated in metastatic breast cancer                                                                                                                                                            | <i>J Proteome Res.</i> 2009;8(2):583–594                                                  |

**Table S4. Cont.**

| Symbol         | Findings                                                                                    | References                                                                                                          |
|----------------|---------------------------------------------------------------------------------------------|---------------------------------------------------------------------------------------------------------------------|
| SUMO1, SUMO2   | Autoantigens in primary biliary cirrhosis                                                   | <i>Hepatology</i> . 2005;41(3):609–616                                                                              |
| SYCP3          | Meiosis-specific protein (SCP-1 already known as immunogenic)                               | <i>Cancer Detect Prev</i> . 2007;31(4):296–302                                                                      |
| TGIF2, TGIF2LX | Amplification and overexpression in ovarian cancer cell lines; miRNA oncogenic target genes | <i>Biochem Biophys Res Commun</i> . 2000;276(1):264–270;<br><i>Proc Natl Acad Sci U S A</i> . 2008;105(36):13556–61 |
| TMB10, TMOD1   | Interact - actin architecture, overexpressed in pancreatic cancer                           | <i>FEBS Lett</i> . 2004;557(1-3):57–63; <i>Pancreatology</i> . 2005;5(4-5):370–379                                  |
| TP53<br>UBL4A  | Tumor suppressor, immunogenic, mutated in cancer<br>Expressed in postmeiotic germ cells     | <i>Gene Expr Patterns</i> . 2007;7(1-2):131–136                                                                     |

**Table S5. Selection of genes coding for immunogenic proteins in pancreatic cancer and previously described for their cancer-specific expression and/or function**

| Symbol          | Remarks                                                                                                                                  | References                                                                                                                             |
|-----------------|------------------------------------------------------------------------------------------------------------------------------------------|----------------------------------------------------------------------------------------------------------------------------------------|
| DNAJB1<br>ELAC1 | (Hsp40) Autoantibody in sera of lung cancer patients<br>Candidate tumor suppressor locus (lung, prostate)                                | <i>Jpn J Cancer Res</i> . 2001;92(3):316–320<br><i>Genomics</i> . 2001;72(2):169–179; <i>Oncogene</i> . 2006;25(41):5591–5600          |
| KIAA1618        | Fusion partner of anaplastic lymphoma kinase in large-cell lymphoma and inflammatory myofibroblastic tumor                               | <i>Genes Chromosomes Cancer</i> . 2002;34(4):354–362                                                                                   |
| LRRC49          | Elevated in estrogen/progesterone receptor-positive primary breast tumors; silenced by promoter hypermethylation                         | <i>Int J Oncol</i> . 2008;33(1):25–31                                                                                                  |
| NR2E3<br>PPARG  | Autoantigen of paraneoplastic retinopathy<br>Highly expressed in pancreatic cancer and is associated with shorter overall survival times | <i>J Neuroophthalmol</i> . 2001;21(3):168–172<br><i>PPAR Res</i> . 2008;2008:326915;<br><i>Clin Cancer Res</i> . 2006;12(21):6444–6451 |
| ROR2            | Promotes tumor growth in renal cell carcinoma; role in metastasis of osteosarcoma                                                        | <i>Oncogene</i> . 2009;28(27):2513–2523;<br><i>Cancer Sci</i> . 2009;100(7):1227–1233                                                  |
| SMOX            | Potential mechanism for inflammation-induced carcinogenesis                                                                              | <i>Cancer Res</i> . 2006;66(23):11125–11130                                                                                            |
| TMOD1, TMSB10   | TMOD1 and TMSB10 Interact - actin architecture, overexpressed in pancreatic cancer                                                       | <i>FEBS Lett</i> . 2004;557(1-3):57–63;<br><i>Pancreatology</i> . 2005;5(4-5):370–379                                                  |



**Table S6. Patient Information**

| Status            | Sample number | Age | Sex | Survival | Stage | Grade | Histo type |
|-------------------|---------------|-----|-----|----------|-------|-------|------------|
| Pancreatic cancer | 45            | 81  | F   | LTS      | 1a    | 3     | pdac       |
| Pancreatic cancer | 54            | 81  | M   | LTS      | 2b    | 3     | pdac       |
| Pancreatic cancer | 62            | 71  | M   | LTS      | 2a    | 1     | pdac       |
| Pancreatic cancer | 106           | 54  | M   | LTS      | 2b    | 2     | pdac       |
| Pancreatic cancer | 121           | 52  | F   | LTS      | 2b    | 1     | pdac       |
| Pancreatic cancer | 216           | 68  | M   | LTS      | 2b    | 1     | pdac       |
| Pancreatic cancer | 230           | 56  | M   | LTS      | 2b    | 2     | pdac       |
| Pancreatic cancer | 253           | 59  | M   | LTS      | 2b    | 2     | pdac       |
| Pancreatic cancer | 259           | 67  | M   | LTS      | 2b    | 1     | pdac       |
| Pancreatic cancer | 264           | 50  | M   | LTS      | 2b    | 3     | pdac       |
| Pancreatic cancer | 290           | 60  | M   | LTS      | 2b    | 2     | pdac       |
| Pancreatic cancer | 293           | 72  | F   | LTS      | 2b    | 3     | pdac       |
| Pancreatic cancer | 349           | 67  | F   | LTS      | 2b    | 2     | pdac       |
| Pancreatic cancer | 372           | 65  | M   | LTS      | 2b    | 3     | pdac       |
| Pancreatic cancer | 434           | 71  | M   | LTS      | 2b    | 3     | pdac       |
| Pancreatic cancer | 446           | 60  | M   | LTS      | 2b    | 3     | pdac       |
| Pancreatic cancer | 451           | 70  | M   | LTS      | 2b    | 2     | pdac       |
| Pancreatic cancer | 466           | 61  | M   | LTS      | 2b    | 2     | pdac       |
| Pancreatic cancer | 478           | 63  | M   | LTS      | 2b    | 2     | pdac       |
| Pancreatic cancer | 37            | 74  | M   | STS      | 2a    | 3     | pdac       |
| Pancreatic cancer | 38            | 63  | M   | STS      | 2b    | 2     | pdac       |
| Pancreatic cancer | 73            | 66  | M   | STS      | 2b    | 2     | pdac       |
| Pancreatic cancer | 74            | 61  | M   | STS      | 2b    | 3     | pdac       |
| Pancreatic cancer | 76            | 75  | M   | STS      | 2b    | 2     | pdac       |
| Pancreatic cancer | 130           | 56  | M   | STS      | 2b    | 3     | pdac       |
| Pancreatic cancer | 132           | 75  | F   | STS      | 2b    | 3     | pdac       |
| Pancreatic cancer | 197           | 46  | M   | STS      | 2b    | 2     | pdac       |
| Pancreatic cancer | 199           | 55  | M   | STS      | 2b    | 2     | pdac       |
| Pancreatic cancer | 206           | 64  | F   | STS      | 2b    | 2     | pdac       |
| Pancreatic cancer | 248           | 59  | M   | STS      | 2b    | 2     | pdac       |
| Pancreatic cancer | 334           | 61  | M   | STS      | 2b    | 3     | pdac       |
| Pancreatic cancer | 467           | 66  | M   | STS      | 2b    | 1     | pdac       |
| Pancreatic cancer | 468           | 77  | F   | STS      | 2b    | 2     | pdac       |
| Pancreatic cancer | 479           | 32  | M   | STS      | 2b    | 3     | pdac       |
| Pancreatic cancer | 484           | 70  | F   | STS      | 2b    | 2     | pdac       |
| Pancreatic cancer | 603           | 56  | M   | STS      | 2b    | 2     | AdSq       |
| Pancreatic cancer | 729           | 54  | F   | STS      | 2b    | 2     | pdac       |
| Pancreatic cancer | 755           | 73  | M   | STS      | 2b    | 2     | pdac       |
| Pancreatic cancer | 63            | 66  | F   | Met      | 4     | 3     | pdac       |
| Pancreatic cancer | 180           | 59  | F   | Met      | 4     | 2     | pdac       |
| Pancreatic cancer | 229           | 58  | M   | Met      | 4     | x     | pdac       |
| Pancreatic cancer | 233           | 50  | M   | Met      | 4     | 3     | AdSq       |
| Pancreatic cancer | 238           | 53  | M   | Met      | 4     | x     | pdac       |
| Pancreatic cancer | 245           | 65  | M   | Met      | 4     | 2     | pdac       |
| Pancreatic cancer | 279           | 81  | M   | Met      | 4     | x     | pdac       |
| Pancreatic cancer | 280           | 31  | F   | Met      | 4     | x     | pdac       |
| Pancreatic cancer | 289           | 65  | F   | Met      | 4     | x     | pdac       |
| Pancreatic cancer | 353           | 69  | M   | Met      | 4     | x     | pdac       |
| Pancreatic cancer | 374           | 68  | F   | Met      | 4     | x     | pdac       |
| Pancreatic cancer | 381           | 46  | F   | Met      | 4     | x     | pdac       |
| Pancreatic cancer | 382           | 66  | M   | Met      | 4     | x     | pdac       |
| Pancreatic cancer | 507           | 76  | M   | Met      | 4     | 2     | pdac       |
| Pancreatic cancer | 549           | 62  | M   | Met      | 4     | 3     | pdac       |
| Pancreatic cancer | 649           | 66  | F   | Met      | 4     | 2     | pdac       |
| Pancreatic cancer | 686           | 69  | F   | Met      | 4     | 2     | pdac       |
| Pancreatic cancer | 747           | 50  | F   | Met      | 4     | 2     | pdac       |
| Pancreatic cancer | 800           | 55  | F   | Met      | 4     | 3     | pdac       |
| Pancreatic cancer | 827           | 63  | M   | Met      | 4     | 3     | pdac       |
| Pancreatic cancer | 832           | 66  | M   | Met      | 4     | 2     | pdac       |
| Pancreatic cancer | 838           | 56  | M   | Met      | 4     | 2     | pdac       |
| Healthy donor     | Con-1         | 61  | F   |          |       |       |            |
| Healthy donor     | Con-7         | 66  | M   |          |       |       |            |
| Healthy donor     | Con-11        | 50  | M   |          |       |       |            |

Table S6. Cont.

| Status         | Sample number | Age | Sex | Survival | Stage | Grade | Histo type |
|----------------|---------------|-----|-----|----------|-------|-------|------------|
| Healthy donor  | Con-12        | 58  | M   |          |       |       |            |
| Healthy donor  | Con-20        | 64  | M   |          |       |       |            |
| Healthy donor  | Con-34        | 87  | M   |          |       |       |            |
| Healthy donor  | Con-35        | 50  | M   |          |       |       |            |
| Healthy donor  | Con-36        | 44  | M   |          |       |       |            |
| Healthy donor  | Con-38        | 60  | F   |          |       |       |            |
| Healthy donor  | Con-39        | 78  | F   |          |       |       |            |
| Healthy donor  | Con-40        | 43  | F   |          |       |       |            |
| Healthy donor  | Con-41        | 81  | M   |          |       |       |            |
| Healthy donor  | Con-46        | 71  | M   |          |       |       |            |
| Healthy donor  | Con-67        | 50  | F   |          |       |       |            |
| Healthy donor  | Con-68        | 62  | F   |          |       |       |            |
| Healthy donor  | Con-75        | 60  | F   |          |       |       |            |
| Healthy donor  | 1000017       | 53  | M   |          |       |       |            |
| Healthy donor  | 1000018       | 92  | M   |          |       |       |            |
| Healthy donor  | 1000040       | 44  | M   |          |       |       |            |
| Healthy donor  | 1000058       | 38  | M   |          |       |       |            |
| Healthy donor  | 1000059       | 59  | M   |          |       |       |            |
| Healthy donor  | 1000135       | 46  | F   |          |       |       |            |
| Healthy donor  | 1000186       | 57  | F   |          |       |       |            |
| Healthy donor  | 1000242       | 79  | M   |          |       |       |            |
| Healthy donor  | 1000245       | 64  | M   |          |       |       |            |
| Healthy donor  | 1000258       | 75  | F   |          |       |       |            |
| Healthy donor  | 1000260       | 71  | F   |          |       |       |            |
| Healthy donor  | 1000279       | 58  | F   |          |       |       |            |
| Healthy donor  | 1000281       | 73  | M   |          |       |       |            |
| Healthy donor  | 1000303       | 58  | M   |          |       |       |            |
| Healthy donor  | 1000308       | 77  | F   |          |       |       |            |
| Healthy donor  | 1000310       | 58  | M   |          |       |       |            |
| Healthy donor  | 1000320       | 81  | F   |          |       |       |            |
| Healthy donor  | 1000325       | 51  | M   |          |       |       |            |
| Healthy donor  | 1000331       | 80  | F   |          |       |       |            |
| Healthy donor  | 1000333       | 81  | F   |          |       |       |            |
| Healthy donor  | 1000340       | 62  | F   |          |       |       |            |
| Healthy donor  | 1000341       | 66  | F   |          |       |       |            |
| Healthy donor  | 1000376       | 73  | F   |          |       |       |            |
| Healthy donor  | 1000387       | 48  | F   |          |       |       |            |
| Healthy donor  | 1000389       | 72  | M   |          |       |       |            |
| Healthy donor  | 1000392       | 62  | M   |          |       |       |            |
| Healthy donor  | 1000394       | 64  | F   |          |       |       |            |
| Healthy donor  | 1000398       | 78  | M   |          |       |       |            |
| Healthy donor  | 1000405       | 66  | M   |          |       |       |            |
| Healthy donor  | 1000424       | 75  | F   |          |       |       |            |
| Healthy donor  | 1000451       | 55  | M   |          |       |       |            |
| Healthy donor  | 1000466       | 38  | M   |          |       |       |            |
| Healthy donor  | 1000510       | 73  | F   |          |       |       |            |
| Healthy donor  | 1000651       | 38  | F   |          |       |       |            |
| Healthy donor  | 1000712       | 66  | M   |          |       |       |            |
| Healthy donor  | 1000713       | 42  | F   |          |       |       |            |
| Healthy donor  | 1001170       | 46  | F   |          |       |       |            |
| Ovarian cancer | SRM00033      | 42  | F   | LTS      | IIIC  | 1     | serous     |
| Ovarian cancer | SRM00053      | 51  | F   | LTS      | IIIC  | 3     | serous     |
| Ovarian cancer | SRM00352      | 59  | F   | LTS      | IIIC  | 2     | serous     |
| Ovarian cancer | SRM00355      | 26  | F   | LTS      | IIIB  | 3     | serous     |
| Ovarian cancer | SRM00393      | 81  | F   | LTS      | IIIC  | 3     | serous     |
| Ovarian cancer | SRM00473      | 53  | F   | LTS      | IIIC  | 3     | serous     |
| Ovarian cancer | SRM00535      | 77  | F   | LTS      | IIIC  | 3     | serous     |
| Ovarian cancer | SRM00558      | 77  | F   | LTS      | IIIC  | 3     | mixed      |
| Ovarian cancer | SRM00722      | 58  | F   | LTS      | IIIC  | 3     | serous     |
| Ovarian cancer | SRM00743      | 64  | F   | LTS      | IIIC  | 3     | serous     |
| Ovarian cancer | SRM00842      | 34  | F   | LTS      | IIIA  | 1     | serous     |
| Ovarian cancer | SRM00859      | 58  | F   | LTS      | IIIC  | 3     | serous     |

Table S6. Cont.

| Status         | Sample number | Age | Sex | Survival | Stage | Grade | Histo type  |
|----------------|---------------|-----|-----|----------|-------|-------|-------------|
| Ovarian cancer | SRM00943      | 66  | F   | LTS      | IIIC  | 3     | serous      |
| Ovarian cancer | SRM00959      | 66  | F   | LTS      | IIIC  | 3     | serous      |
| Ovarian cancer | SRM01005      | 70  | F   | LTS      | IIIC  | 3     | serous      |
| Ovarian cancer | SRM01467      | 44  | F   | LTS      | IV    | 3     | serous      |
| Ovarian cancer | SRM01489      | 48  | F   | LTS      | IIIC  | 3     | serous      |
| Ovarian cancer | SRM01527      | 66  | F   | LTS      | IIIC  | 3     | serous      |
| Ovarian cancer | SRM01856      | 74  | F   | LTS      | IIIC  | 3     | endometroid |
| Ovarian cancer | SRM01859      | 46  | F   | LTS      | IIIC  | 3     | mixed       |
| Ovarian cancer | SRM02258      | 76  | F   | LTS      | IIIC  | 3     | serous      |
| Ovarian cancer | SRM02504      | 46  | F   | LTS      | IIIC  | 3     | serous      |
| Ovarian cancer | SRM02634      | 57  | F   | LTS      | IIIC  | 3     | serous      |
| Ovarian cancer | SRM02752      | 41  | F   | LTS      | IIIC  | x     | serous      |
| Ovarian cancer | SRM02800      | 38  | F   | LTS      | IIIC  | 3     | NA          |
| Ovarian cancer | SRM15024      | 62  | F   | LTS      | IIIC  | 3     | serous      |
| Ovarian cancer | SRM00312      | 64  | F   | IntS     | IIIC  | 3     | serous      |
| Ovarian cancer | SRM00622      | 77  | F   | IntS     | IIIC  | 3     | serous      |
| Ovarian cancer | SRM01546      | 80  | F   | IntS     | IIIC  | 3     | serous      |
| Ovarian cancer | SRM01798      | 62  | F   | IntS     | IIIC  | 3     | serous      |
| Ovarian cancer | SRM02547      | 72  | F   | IntS     | IIIC  | 3     | serous      |
| Ovarian cancer | SRM03694      | 79  | F   | IntS     | IIIC  | 3     | mixed       |
| Ovarian cancer | SRM04750      | 73  | F   | IntS     | IIIC  | 3     | serous      |
| Ovarian cancer | SRM00809      | 68  | F   | STS      | IIIC  | 3     | serous      |
| Ovarian cancer | SRM00862      | 78  | F   | STS      | IIIC  | 3     | serous      |
| Ovarian cancer | SRM01374      | 82  | F   | STS      | IIIC  | 3     | serous      |
| Ovarian cancer | SRM01518      | 48  | F   | STS      | IIIC  | 3     | serous      |
| Ovarian cancer | SRM02162      | 58  | F   | STS      | IIIC  | 2     | serous      |
| Ovarian cancer | SRM02393      | 81  | F   | STS      | IIIB  | 3     | serous      |
| Ovarian cancer | SRM02544      | 88  | F   | STS      | IIIC  | 3     | serous      |
| Ovarian cancer | SRM02893      | 49  | F   | STS      | IIIC  | 3     | clear cell  |
| Ovarian cancer | SRM03582      | 75  | F   | STS      | IV    | 2     | serous      |
| Ovarian cancer | SRM04744      | 45  | F   | STS      | IIIC  | 3     | clear cell  |
| Ovarian cancer | SRM04752      | 62  | F   | STS      | IIIC  | 3     | serous      |
| Ovarian cancer | SRM14085      | 71  | F   | STS      | IIIC  | 3     | serous      |
| Ovarian cancer | SRM14175      | 58  | F   | STS      | IV    | 3     | serous      |
| Ovarian cancer | SRM14182      | 55  | F   | STS      | IIIC  | 3     | mixed       |
| Ovarian cancer | SRM14326      | 66  | F   | STS      | IIIC  | 2     | mucinous    |
| Ovarian cancer | SRM14667      | 59  | F   | STS      | IIIC  | 2     | serous      |
| Ovarian cancer | SRM15261      | 75  | F   | STS      | IIIC  | x     | serous      |
| Ovarian cancer | SRM15555      | 58  | F   | STS      | IV    | 3     | serous      |

AdSq, adenosquamous carcinoma; Histo type, histological type; IntS, intermediate-term survivor; LTS, long-term survivor; Met, metastatic disease; pdac, pancreatic ductal adenocarcinoma; STS, short-term survivor; x, information not available. stage for pancreatic cancer was determined by American Joint Committee on Cancer'2002 Sixth Edition.
